# Supplementary material for: Phenotype assessment for neurodegenerative murine models with ataxia and application to Niemann–Pick disease, type C1
Source: PubMed Central journal article supplement (PMC9096702; doi:10.1242/bio.059052), 2022-05-03
Supplement: biolopen-11-059052-s1.pdf [file biolopen-11-059052-s1.pdf]

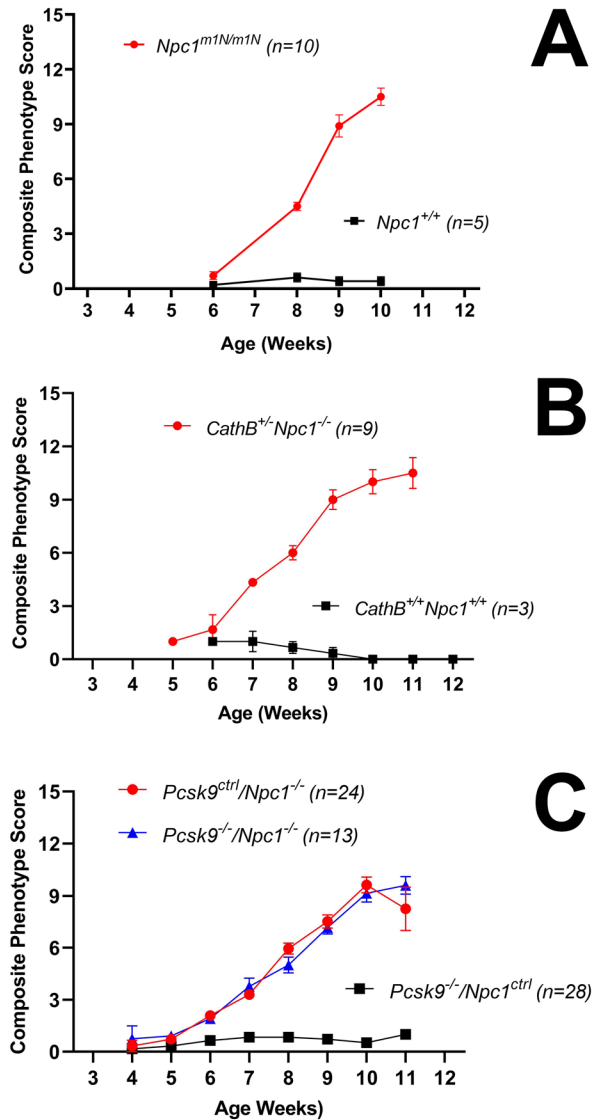

**Fig. S1. Time course for *Npc1<sup>m1N</sup>* model on different backgrounds.** (A) Time course of composite phenotype scores for BALB/cNctr-*Npc1<sup>m1N</sup>*/J mice (Jackson Laboratory Stock No. 003092) evaluated in laboratory A by one individual. (B) Time course of composite phenotype scores for C57Bl/6:SV129:BALB/c-*Npc1<sup>m1N</sup>* evaluated in laboratory B by two individuals. (C) Time course of composite phenotype scores for C57Bl/6:BALBc-*Npc1<sup>m1N</sup>* mice evaluated in laboratory B by two individuals (previously published data with modifications to graph layout as permitted by the open access Creative Common CC BY license (Cawley et al., 2020)). Even with different mixed backgrounds, *Npc1<sup>m1N</sup>* mice exhibit very similar phenotype scores as disease progresses. All values represent mean±s.e.m. for biological replicates.

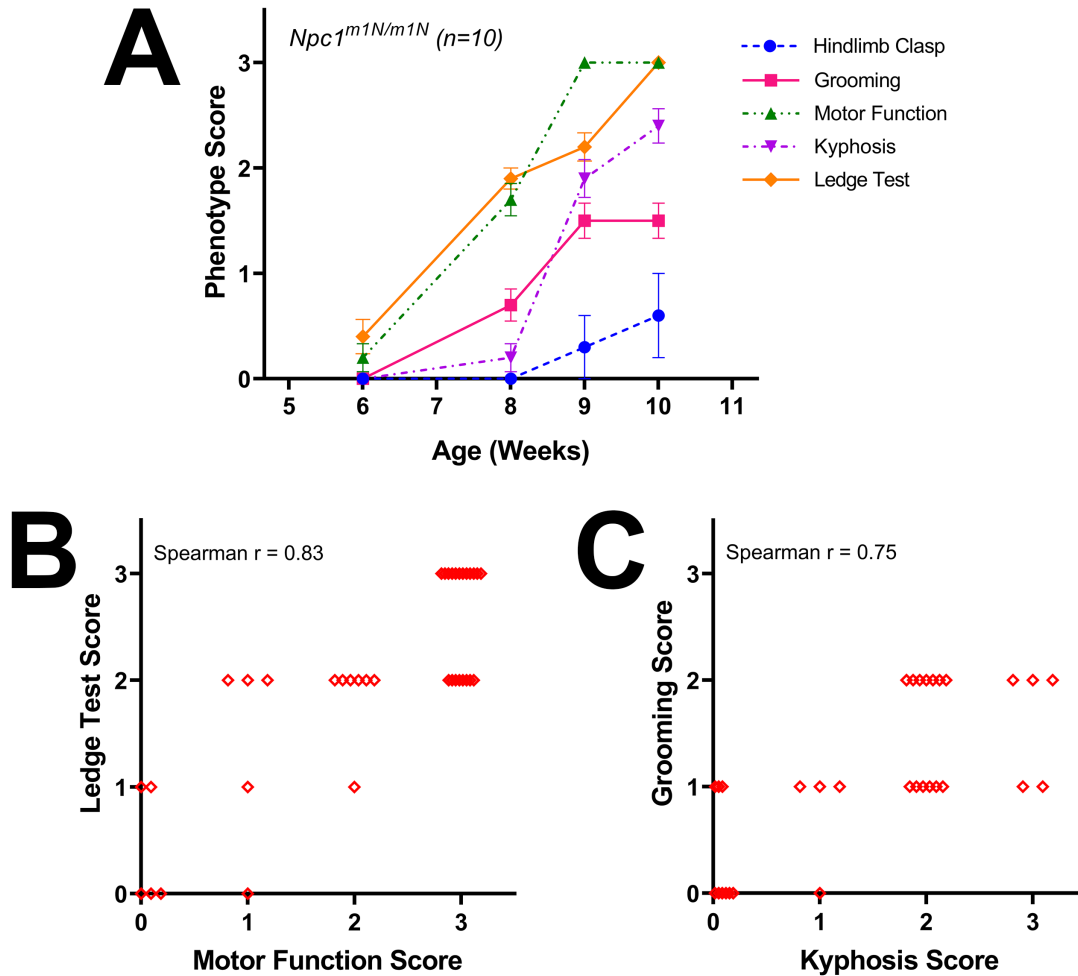

**Fig. S2. Individual parameters over time and correlation between parameters.** (A) Using the *Npc1<sup>m1N/m1N</sup>* mice depicted in Supplemental Fig. 1A as an example, the time course for each phenotype parameter is presented (n = 10). (B, C) Although some parameters seem to overlap, analysis of correlation suggest incomplete agreement for ledge test and motor function (B; Spearman's coefficient  $r = 0.83$ ) as well as grooming and kyphosis (C; Spearman's coefficient  $r = 0.75$ ). Values in (A) represent mean $\pm$ s.e.m. for biological replicates. Values in (B, C) represent biological replicates over time (scores for mice depicted in (A) at 6, 8, 9, and 10 weeks of age).

**Table S1.** Reliability Coefficient Guidelines (Landis & Koch, 1977)

| kappa       | Interpretation                      |
|-------------|-------------------------------------|
| 0.00        | Completely Random Agreement         |
| 0.01 – 0.20 | Slight agreement                    |
| 0.21 – 0.40 | Fair agreement                      |
| 0.41 – 0.60 | Moderate agreement                  |
| 0.61 – 0.80 | Substantial agreement               |
| 0.81 – 1.00 | Almost perfect to perfect agreement |

**Table S2.** Krippendorff's alpha for ratings analyzed as nominal and ordinal categories

| Parameter        | Sample size          | Krippendorff's alpha |               |
|------------------|----------------------|----------------------|---------------|
|                  |                      | nominal              | ordinal       |
| Hindlimb clasp   | 14 raters, 5 videos  | 0.808                | 0.907         |
| Bootstrap 95% CI |                      | 0.319 – 1.000        | 0.508 – 1.000 |
| Grooming         | 14 raters, 7 images  | 0.692                | 0.859         |
| Bootstrap 95% CI |                      | 0.410 – 0.864        | 0.567 – 0.958 |
| Motor function   | 14 raters, 5 videos  | 0.750                | 0.906         |
| Bootstrap 95% CI |                      | 0.295 – 0.950        | 0.399 – 0.998 |
| Kyphosis         | 14 raters, 5 videos  | 0.788                | 0.923         |
| Bootstrap 95% CI |                      | 0.337 – 1.000        | 0.337 – 1.000 |
| Ledge test       | 17 raters, 12 videos | 0.733                | 0.899         |
| Bootstrap 95% CI |                      | 0.549 – 0.860        | 0.767 – 0.951 |

Bootstrap confidence intervals computed using n = 1000 replications.

## References

- CAWLEY, N. X., LYONS, A. T., ABEBE, D., WASSIF, C. A. & PORTER, F. D. 2020.  
Evaluation of the Potential Role of Proprotein Convertase Subtilisin/Kexin  
Type 9 (PCSK9) in Niemann-Pick Disease, Type C1. *Int J Mol Sci*, 21.
